# Supplementary material for: PAHSAs attenuate immune responses and promote β cell survival in autoimmune diabetic mice
Source: JCI journal article supplement (doi:10.1172/jci122445), 2019-08-04
Supplement: sd1 [file 1]

## Supplementary Figures and Legends

### Supplementary Figure-1:

#### a) Early Intervention Study Design

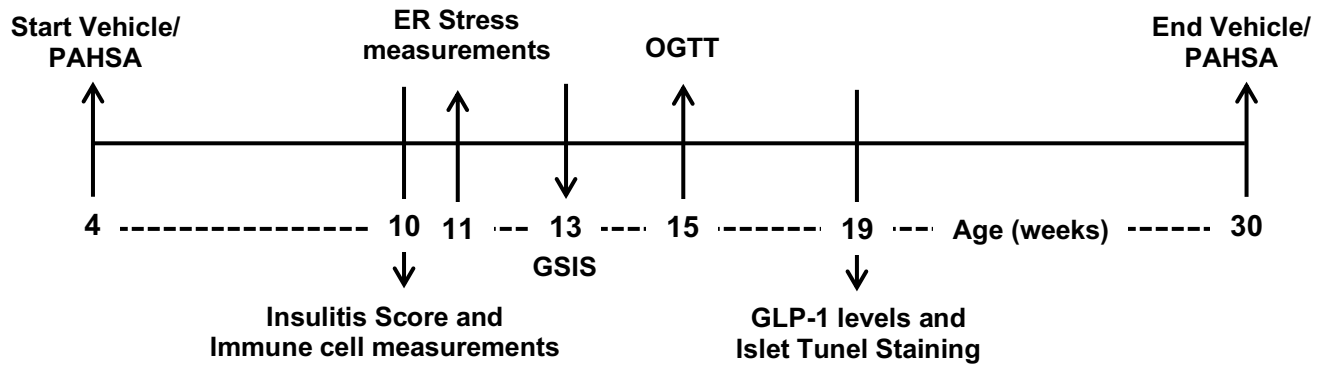

#### b) Late Intervention Study Design

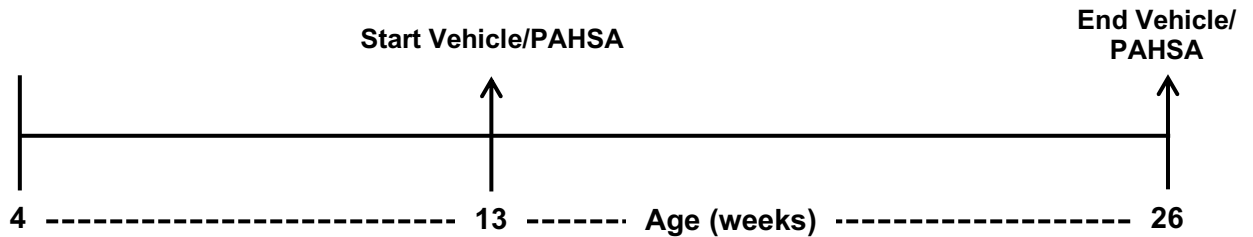

#### c)

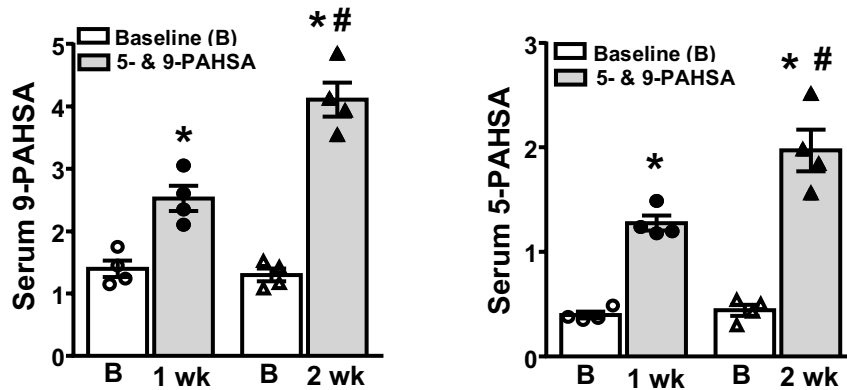

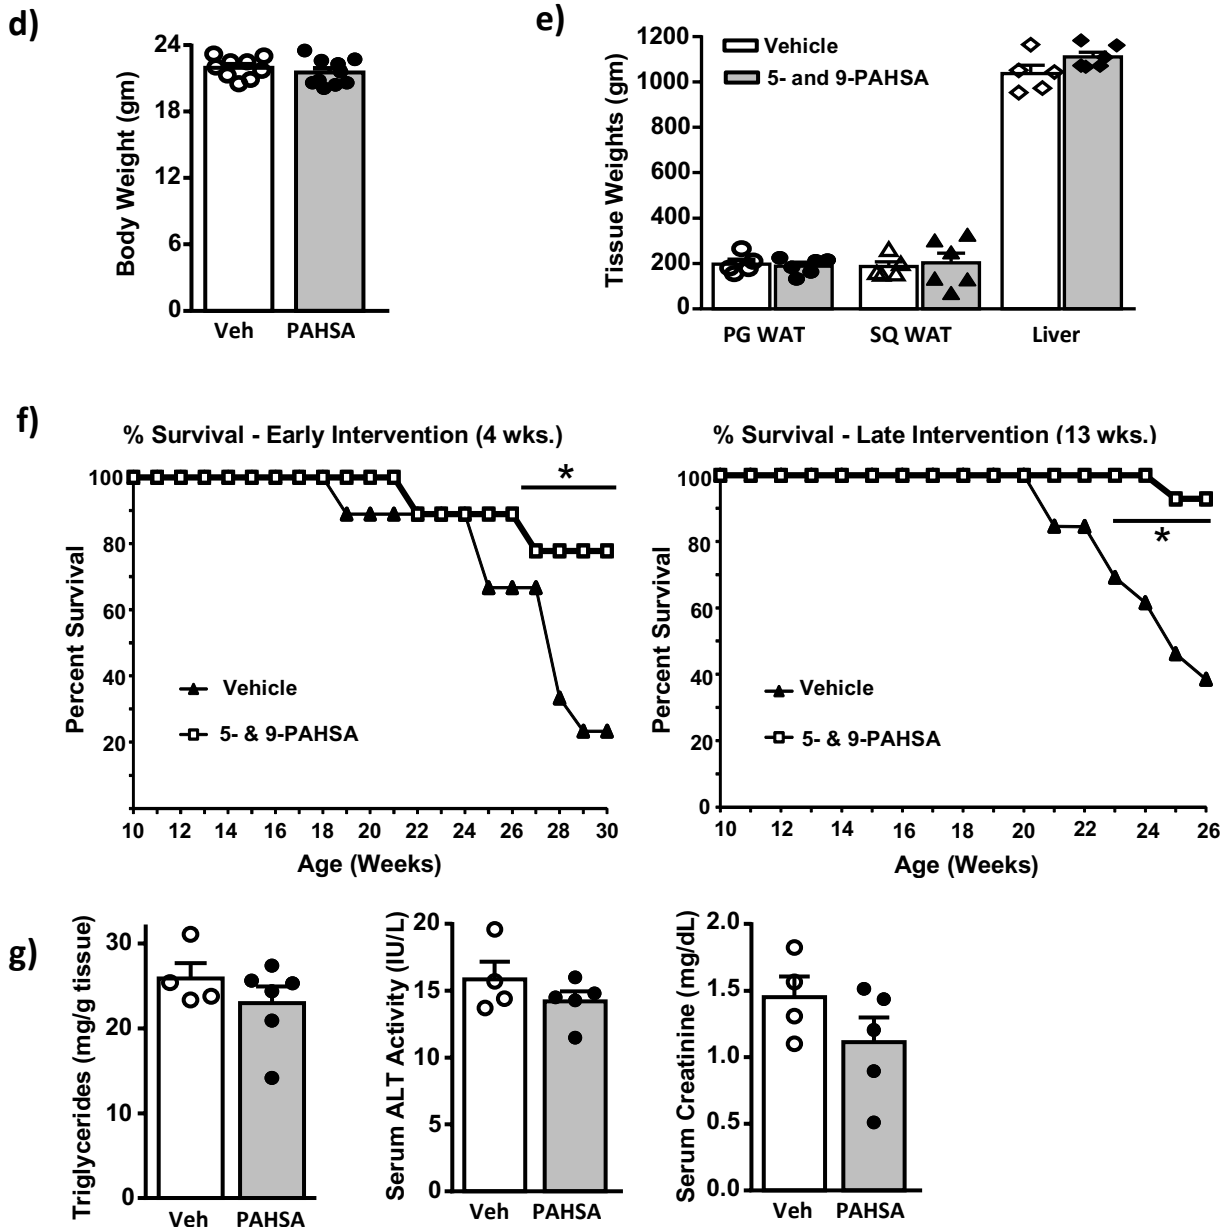

**Supplementary Figure 1:** Study design for **(a)** early intervention study **(b)** late intervention study. **(c)** Serum 5- and 9-PAHSA levels at baseline and after 5- and 9-PAHSA oral gavage for 1 week and 2 weeks in chow-fed, non-diabetic C57blk6 male mice.  $n=4/\text{group}$ ;  $*p<0.05$  vs respective baseline;  $\#p<0.05$  vs PAHSA levels at 1 wk. Differences between groups were assessed by one way ANOVA with Newman-Keuls multiple-comparison test. **(d)** Body weight and **(e)** tissue weights in female non obese diabetic (NOD) mice treated with 5- and 9-PAHSAs (15 mg/kg body weight per day of each) via oral gavage for 6 weeks.  $n=5-10/\text{group}$ . PG WAT – Perigonadal white adipose tissue; SQ WAT – Subcutaneous white adipose tissue. **(f)** Survival rate in female NOD mice treated with 5- and 9-PAHSA for 26 wks starting at 4 wks of age (early intervention).  $n=22-23/\text{group}$ , and for 13 wks starting at 13 wks of age (later intervention).  $n=13/\text{group}$ . Differences between groups were assessed by log-rank test.  $*p<0.05$  between groups. **(g)** Liver triglycerides and serum alanine aminotransferase (ALT) and Creatinine levels

in the same vehicle- and PAHSA-treated NOD mice studied in panels (d) and (e). n=4-6/group. Data are means±SEM. For d), e) and g), data were assessed by Student's t-test (two-tailed).

**Supplementary Figure-2:**

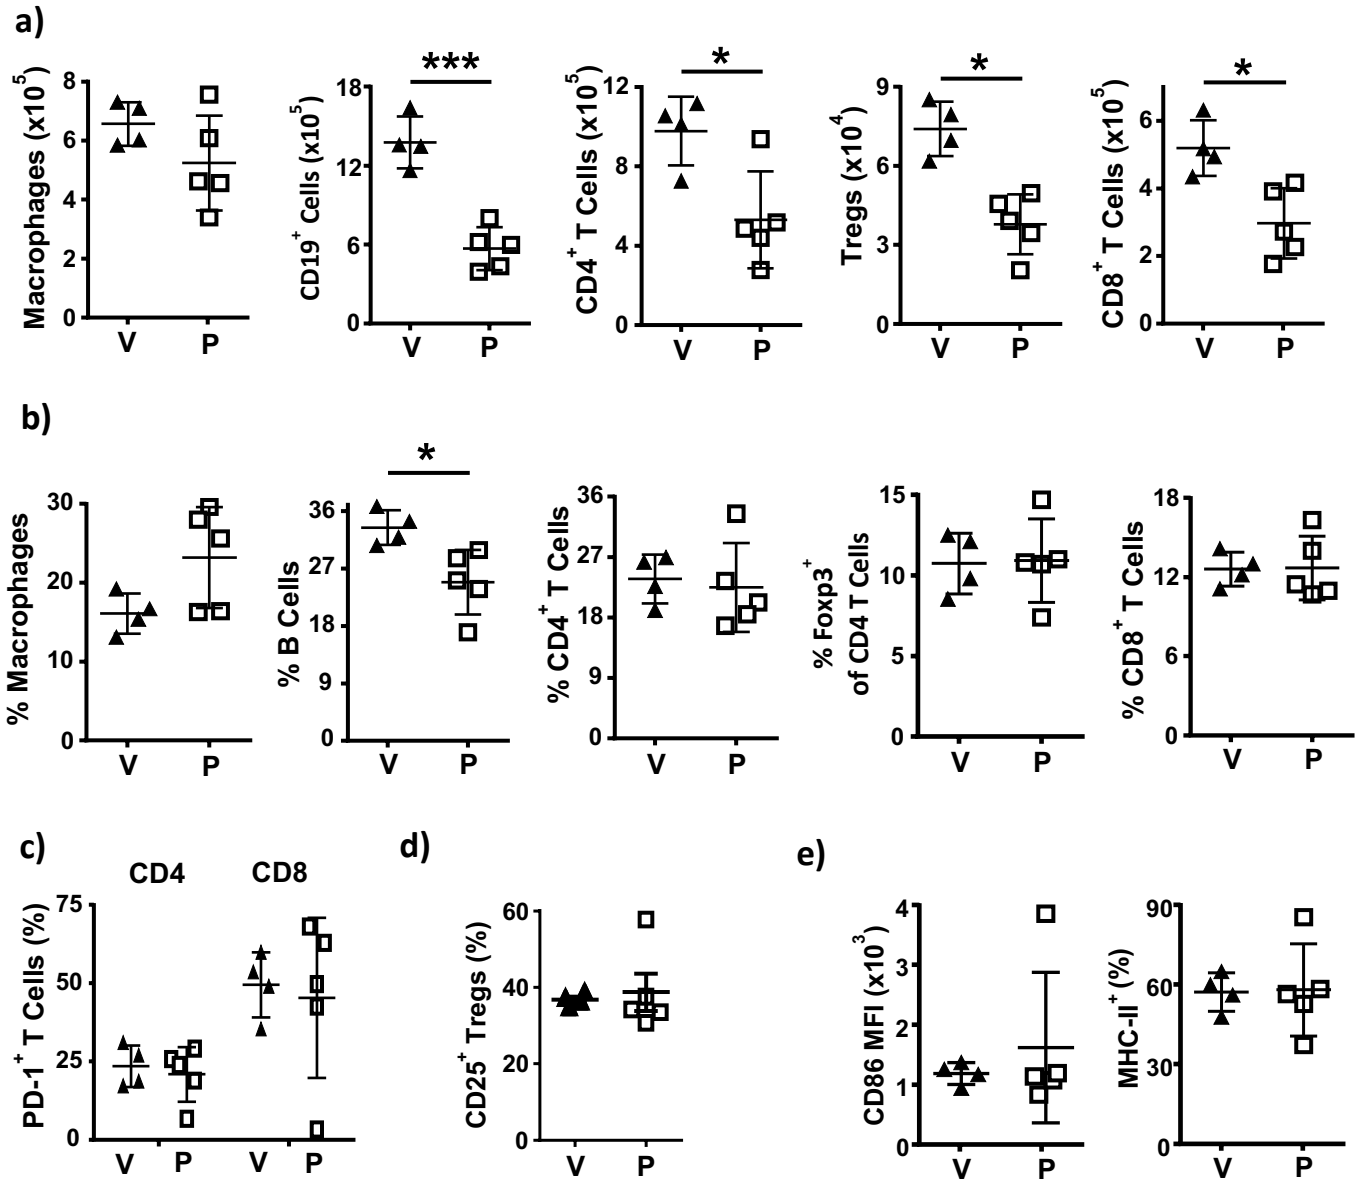

**Supplementary Figure 2:** Effects of PAHSA treatment in NOD mice on the major immune-cell subsets: **(a)** total number and **(b)** expressed as a fraction of CD45<sup>+</sup> cells from the pancreas of mice treated with 5- and 9-PAHSA- or vehicle for 11 weeks (15 weeks of age). n = 4–5. \*p<0.05 and \*\*\*p<0.0001 vs. vehicle treated mice. **(c)** Proportions of PD-1<sup>+</sup> T cells within the CD4 and CD8 cell populations in the pancreas of 5- and 9-PAHSA- or vehicle-treated mice. n = 4–5. **(d)** Proportions of CD25<sup>+</sup> Tregs in the pancreas of PAHSA- or vehicle-treated NOD mice. n = 4–5. **(e)** Mean fluorescence intensity (left panel) and percent of MHC-II<sup>+</sup> cells (right panel) in the

pancreas of 5- and 9-PAHSA- or vehicle-treated NOD mice. Data are means±SEM. Differences between groups were assessed by Student's t-test (two-tailed).

**Supplementary Figure-3:**

a)

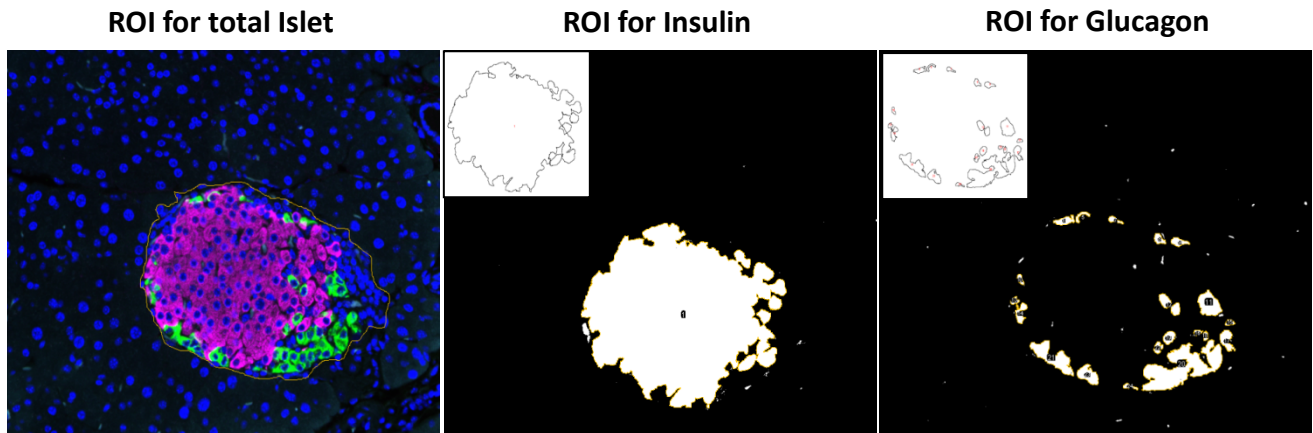

b) MIN6 Cells – 24 hrs. treatment

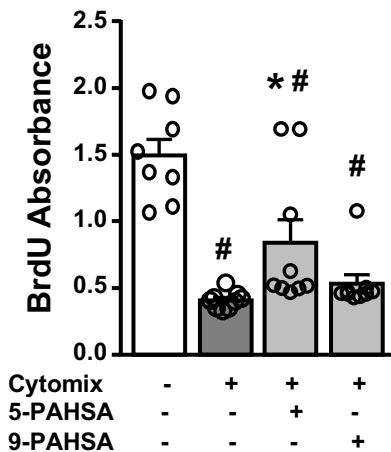

**Supplementary Figure 3: (a)** Representative image defining the method for outlining islets to perform the calculations for  $\beta$ -cell and  $\alpha$ -cell area. ROI – Region of interest. **(b)** MIN6 cells were treated with Cytomix (TNF $\alpha$  + IL-1 $\beta$  + IFN- $\gamma$ ; 5 + 5 + 10 ng/mL) in the continuous presence or absence of 5-PAHSA (20  $\mu$ M) or 9-PAHSA (20  $\mu$ M) for 24 hours and  $\beta$ -cell proliferation was measured by BrdU incorporation into cells. n=8, and 12 wells/condition. # p<0.05 vs. Control with no PAHSA treatment; \*p<0.05 vs Cytomix with no PAHSA treatment and control with no

PAHSA treatment. Data are means±SEM. Differences between groups were assessed by one way ANOVA with Newman-Keuls multiple comparison test.

**Supplementary Figure-4:**

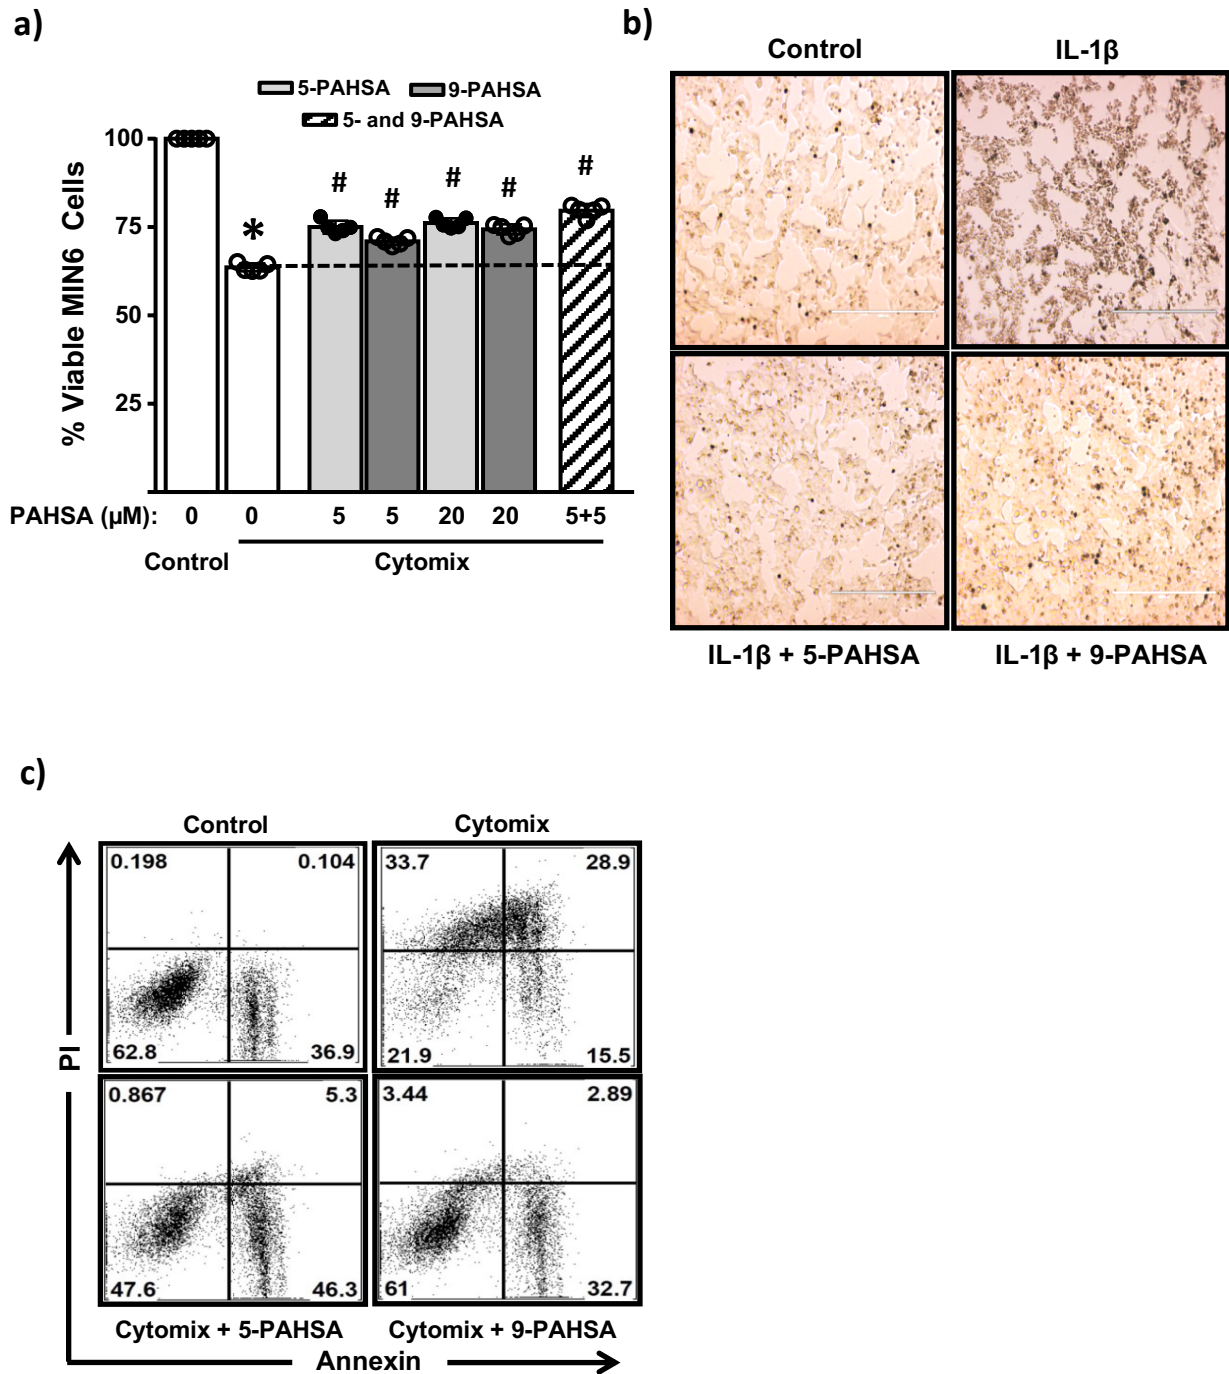

**Supplementary Figure 4:** **(a)** MIN6 cells were treated with either DMSO alone or Cytomix (TNF $\alpha$  + IL-1 $\beta$  + IFN- $\gamma$ ; 5 + 5 + 10 ng/mL) for 48 hours in the presence or absence of 5-PAHSA (5 or 20  $\mu$ M) or 9-PAHSA (5 or 20  $\mu$ M) or 5- and 9-PAHSA together (5  $\mu$ M each). The percent viable  $\beta$ -cells were measured by MTT assay. n=5 plates each of which had 6 wells/condition. \*p<0.05 vs. control alone; #p<0.05 vs both control alone and Cytomix alone. Data are means $\pm$ SEM. Differences between groups were assessed by one way ANOVA with Tukey`s multiple comparison test. **(b)** Morphology of MIN6 cells that were treated with either diluent or Interleukin (IL) 1- $\beta$  (10 ng/mL) for 48 h in the presence or absence of 5-PAHSA (5  $\mu$ M) or 9-PAHSA (5  $\mu$ M). Data are representative of two independent experiments performed in triplicate (Magnification – 20x). **(c)** Represents the gating strategy for the number of viable, late-apoptotic and necrotic MIN6 cells treated with cytomix in the presence or absence of 5- and 9-PAHSA (See Figure 4b)

**Supplementary Figure-5:**

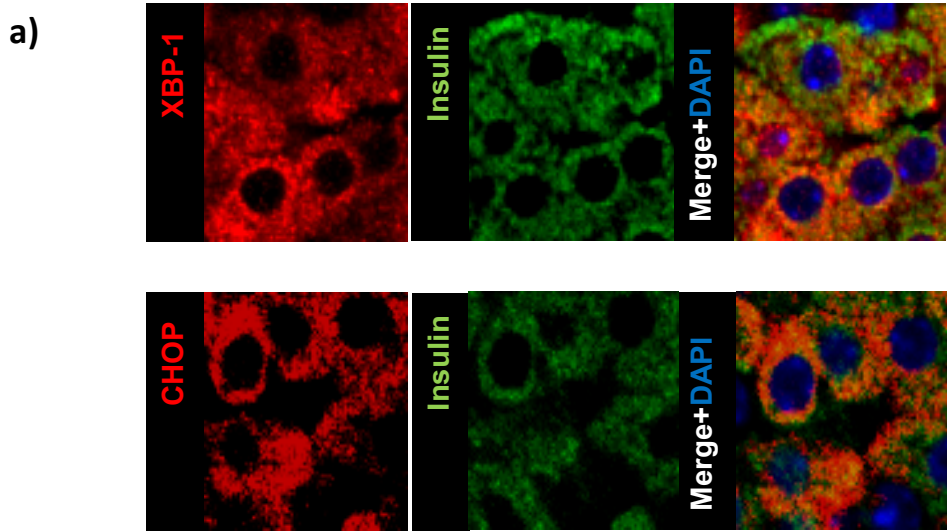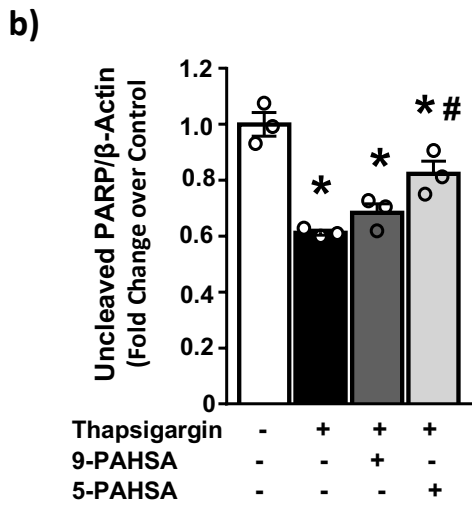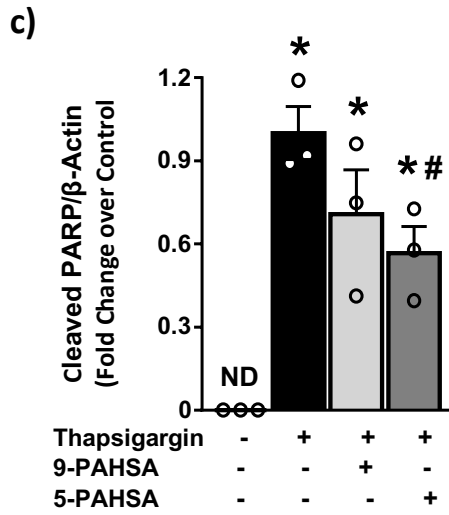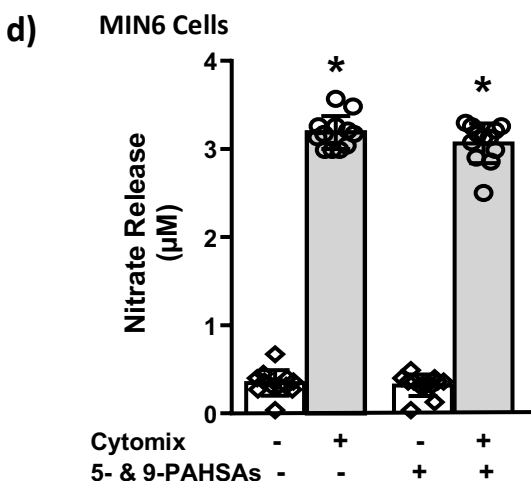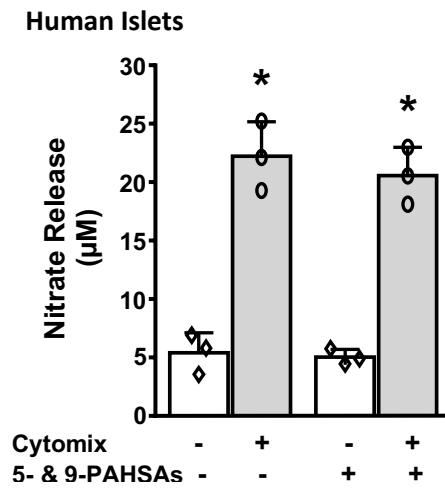

**Supplementary Figure 5:** **(a)** Female NOD mice were treated with vehicle or 5- and 9-PAHSA for 7 weeks starting at 4 weeks of age and XBP-1, CHOP and insulin intensities in pancreatic islets were determined by immunohistochemistry. These insets correspond to Figure 5A and 5B, and demonstrate Xbp1 and CHOP staining in insulin-staining beta cells indicating these proteins are present in beta cells. n=4-5 mice/group. Original magnification, x256. **(b and c)** Human islets from a normal donor were treated with Thapsigargin (2  $\mu$ mol/L) for 6 hours in the presence or absence of 5-PAHSA or 9-PAHSA (20  $\mu$ M each). Western blot analysis was performed with the cell lysates to determine PARP cleavage. n=3 wells/condition and each well had 250 islets. Bar graphs show the densitometric analysis of the fold change of **(b)** uncleaved PARP over  $\beta$ -actin compared to the control condition (no Thapsigargin or PAHSAs, White bar) and **(c)** cleaved PARP over  $\beta$ -actin compared to thapsigargin alone with no PAHSAs (black bar). \* p<0.05 vs control DMSO; # <0.05 vs Thapsigargin plus DMSO. Data are means $\pm$ SEM. Differences between groups were assessed by one way ANOVA with Newman-Keul's multiple comparison test. **(d)** MIN6 cells (left panel) or human islets (right panel) were treated with either DMSO alone (-) or Cytomix (TNF $\alpha$  + IL-1 $\beta$  + IFN- $\gamma$ ; 5 + 5 + 10 ng/mL) (+) for 24 hours in the presence or absence of 5- and 9-PAHSA (20  $\mu$ M of each). The amount of NO release into media was measured by Modified Griess Reagent assay. For MIN6 cells, n=12 wells each of which had 8 wells/condition. For human islets, n=3 wells/condition and each well had 75 islets. \*p<0.05 vs. no Cytomix treatment. Data are means $\pm$ SEM. Differences between groups were assessed by one way ANOVA with Newman-Keul's multiple comparison test.
